# Supplementary material
Source: publisher site journal article supplement (http://www.kjim.org/upload/media/kjim-2022-201-Supplementary-Table-2.pdf)
Supplement: Supplementary file 1 [file kjim-2022-201-Supplementary-Table-2.pdf]

**Supplementary Table 2. Univariate analysis for 30-day and 60-day mortalities in overall patients after PS matching**

|                                                 | No. of patients | Unadjusted OR (95% CI) | <i>p</i> value |
|-------------------------------------------------|-----------------|------------------------|----------------|
| <b>30-day mortality</b>                         |                 |                        |                |
| Age                                             | 218             | 1.08 (1.04–1.12)       | < 0.001        |
| Male sex                                        | 130             | 0.72 (0.35–1.48)       | 0.360          |
| Body mass index                                 | 218             | 1.00 (0.93–1.09)       | 0.925          |
| Comorbidity                                     | 149             | 1.76 (0.79–4.36)       | 0.190          |
| PaO <sub>2</sub> /FiO <sub>2</sub> at admission | 218             | 1.00 (0.99–1.00)       | 0.111          |
| Remdesivir                                      | 146             | 1.90 (0.85–4.68)       | 0.140          |
| Vasopressor                                     | 82              | 6.93 (3.16–16.51)      | < 0.001        |
| Renal replacement therapy                       | 34              | 7.29 (3.22–16.70)      | < 0.001        |
| Maximal dose of corticosteroid, mg              | 218             | 1.01 (1.00–1.01)       | 0.130          |
| Ordinal clinical severity scale                 | 218             |                        | 0.002          |
| 3                                               | 75              | Reference              |                |
| 4                                               | 115             | 22.70 (4.66–409.83)    |                |
| 5                                               | 28              | 29.60 (5.02–566.00)    |                |
| Duration of corticosteroid                      | 218             |                        | 0.013          |
| Long-term users                                 | 109             | Reference              |                |
| Short-term users                                | 109             | 2.65 (1.23–5.71)       |                |
| <b>60-day mortality</b>                         |                 |                        |                |
| Age                                             | 218             | 1.08 (1.05–1.12)       | < 0.001        |
| Male sex                                        | 130             | 0.84 (0.45–1.56)       | 0.570          |
| Body mass index                                 | 218             | 1.03 (0.96–1.10)       | 0.438          |
| Comorbidity                                     | 149             | 2.21 (1.09–4.80)       | 0.034          |
| PaO <sub>2</sub> /FiO <sub>2</sub> at admission | 218             | 1.00 (0.99–1.00)       | 0.312          |
| Remdesivir                                      | 146             | 1.43 (0.74–2.88)       | < 0.001        |
| Vasopressor                                     | 82              | 7.68 (3.93–15.71)      | < 0.001        |
| Renal replacement therapy                       | 34              | 14.26 (6.26–35.22)     | < 0.001        |
| Maximal dose of corticosteroid (mg)             | 218             | 1.01 (1.00–1.01)       | 0.120          |
| Ordinal clinical severity scale                 | 218             |                        |                |
| 3                                               | 75              | Reference              | < 0.001        |
| 4                                               | 115             | 17.31 (5.05–108.86)    |                |
| 5                                               | 28              | 48.67 (11.95–334.30)   |                |
| Duration of corticosteroid                      | 218             |                        | 0.280          |
| Long-term users                                 | 109             | Reference              |                |
| Short-term users                                | 109             | 1.41 (0.76–2.62)       |                |

PS, propensity score; OR, odds ratio; CI, confidence interval; PaO<sub>2</sub>, partial pressure of oxygen; FiO<sub>2</sub>, fraction of inspired oxygen.
